# Supplementary material for: PEI functionalized NaCeF4:Tb3+/Eu3+ for photoluminescence sensing of heavy metal ions and explosive aromatic nitro compounds
Source: Royal Society of Chemistry journal article supplement (doi:10.1039/d1ra02910j), 2021-01-01
Supplement: d1ra02910j1.pdf [file d1ra02910j1.pdf]

**(Supplementary Information)**

**PEI Functionalized NaCeF<sub>4</sub>:Tb<sup>3+</sup>/Eu<sup>3+</sup> For Photoluminescence  
Sensing of Heavy Metal Ions and Explosive Aromatic Nitro  
Compounds**

Richa Singhaal, LobzangTashi, Zaib ul Nisa, Nargis Akhter Ashashi,  
Charanjeet Sen, Swaita Devi, Haq Nawaz Sheikh<sup>a</sup>

<sup>a</sup>Department of Chemistry, University of Jammu, Baba Sahib Ambedkar Road, Jammu-  
180006, India

[hnsheikh@rediffmail.com](mailto:hnsheikh@rediffmail.com)

**Table of Contents**

| <b>CONTENTS</b>               | <b>Pages</b> |
|-------------------------------|--------------|
| 1. PXRD.....                  | S2           |
| 2. EDS .....                  | S3-S4        |
| 3. TEM .....                  | S5           |
| 4. HR-TEM .....               | S6           |
| 5. FT-IR spectra.....         | S7-S10       |
| 6. PL spectra.....            | S11          |
| 7. Life time decay curve..... | S12-13       |
| 8. Quenching efficiency.....  | S14-S15      |
| 9. EDS data Tables.....       | S16-S17      |

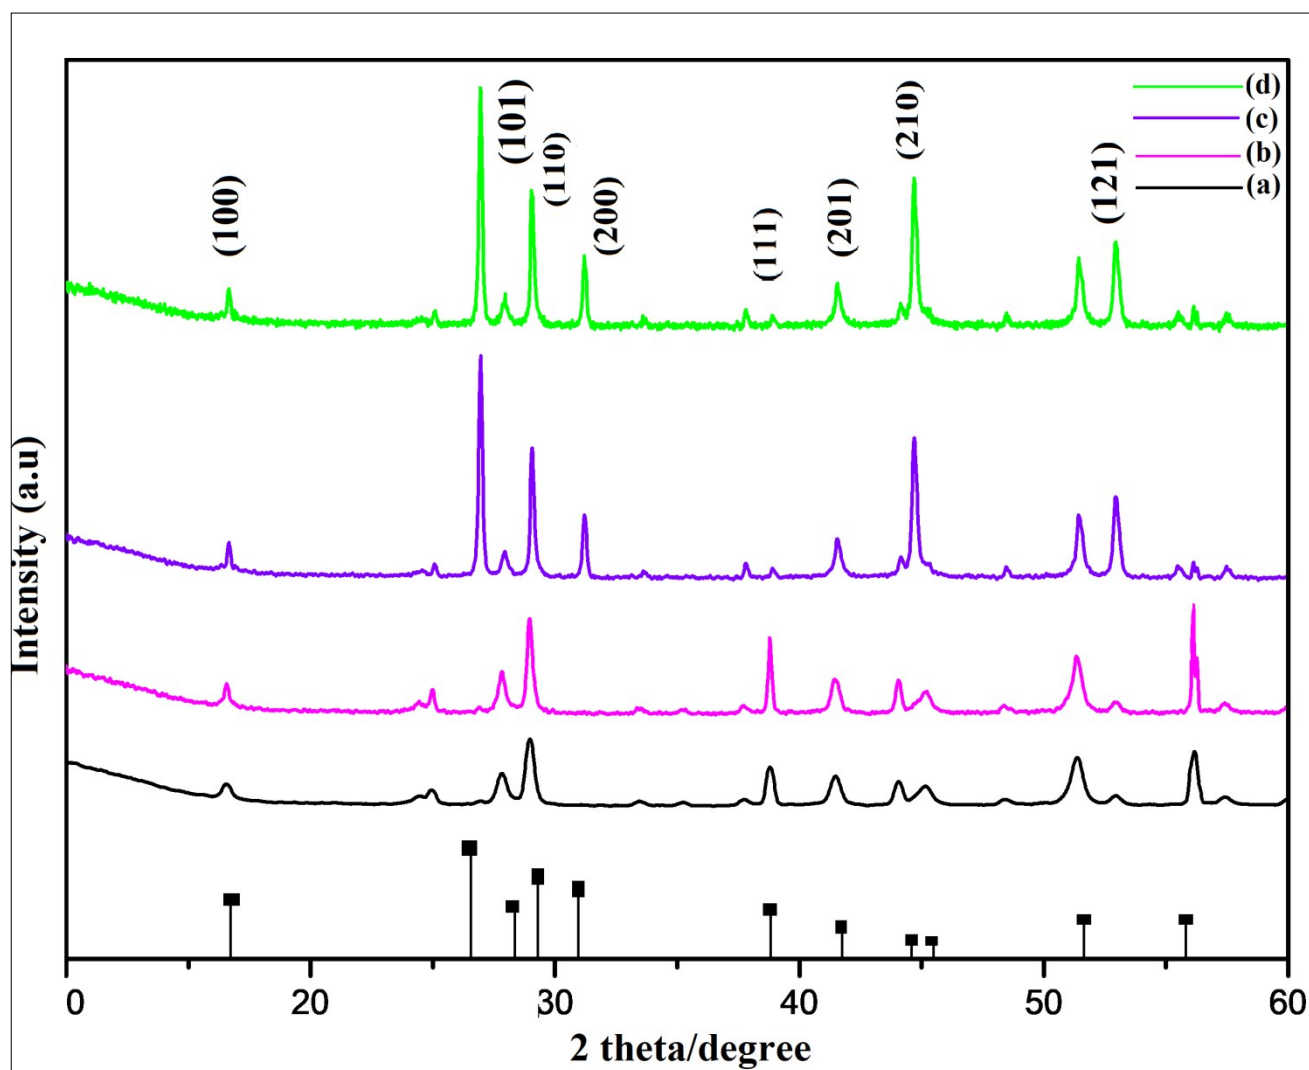

**Fig. S1** PXR D plots of  $\text{NaCeF}_4:\text{Tb}^{3+}$  (Tb-5%) nanophosphors fabricated at different heating temperatures **(a)** 120 °C **(b)** 140 °C **(c)** 160 °C **(d)** 180 °C

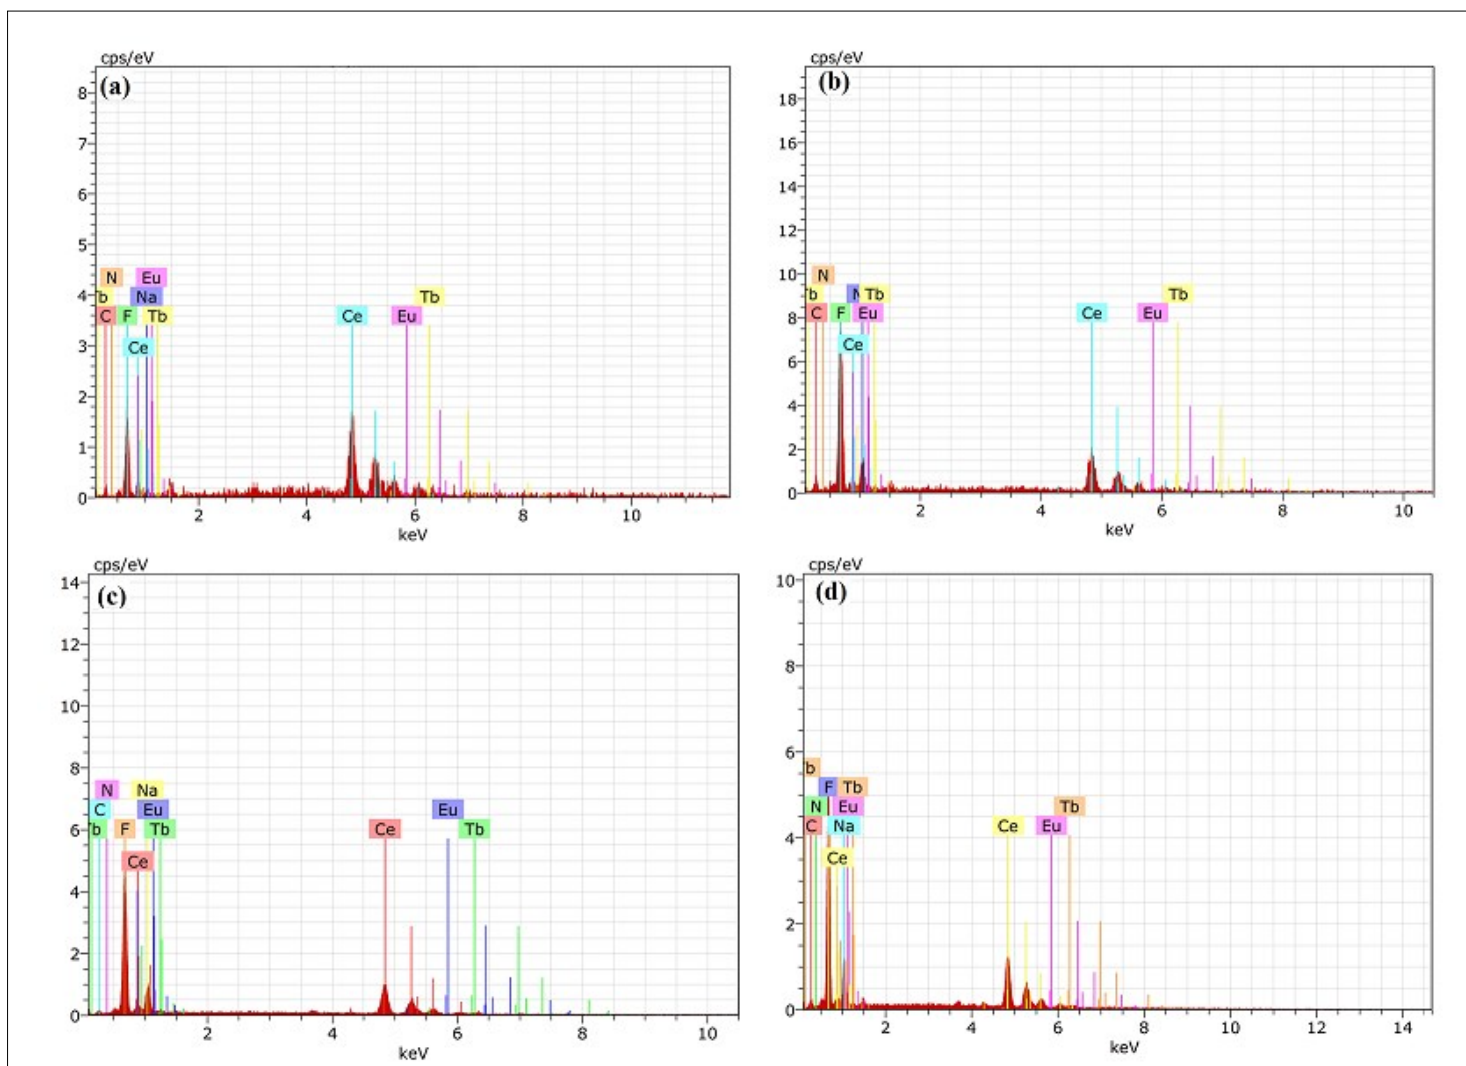

**Fig.S2** EDS spectra of Tb<sup>3+</sup> (5%) doped NaCeF<sub>4</sub> nanocrystals synthesized at different heating temperatures (a) 120 °C (b) 140 °C (c) 160 °C (d) 180 °C

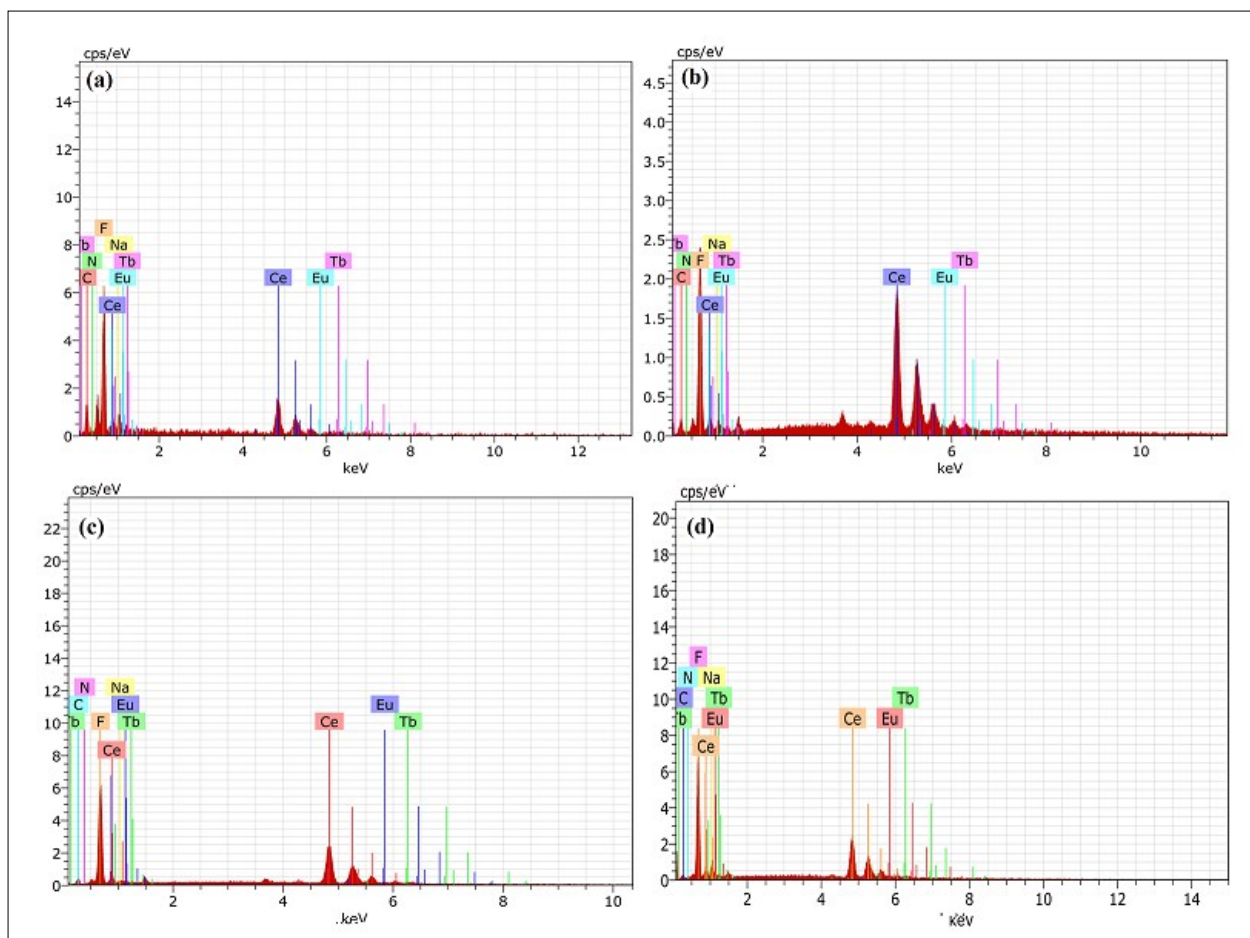

**Fig. S3** EDS spectra of fabricated  $\text{NaCeF}_4:\text{Tb}^{3+}/\text{Eu}^{3+}$  nanophosphors with varying  $\text{Eu}^{3+}$  molar concentrations: (a) 1% (b) 3% (c) 5% (d) 7%

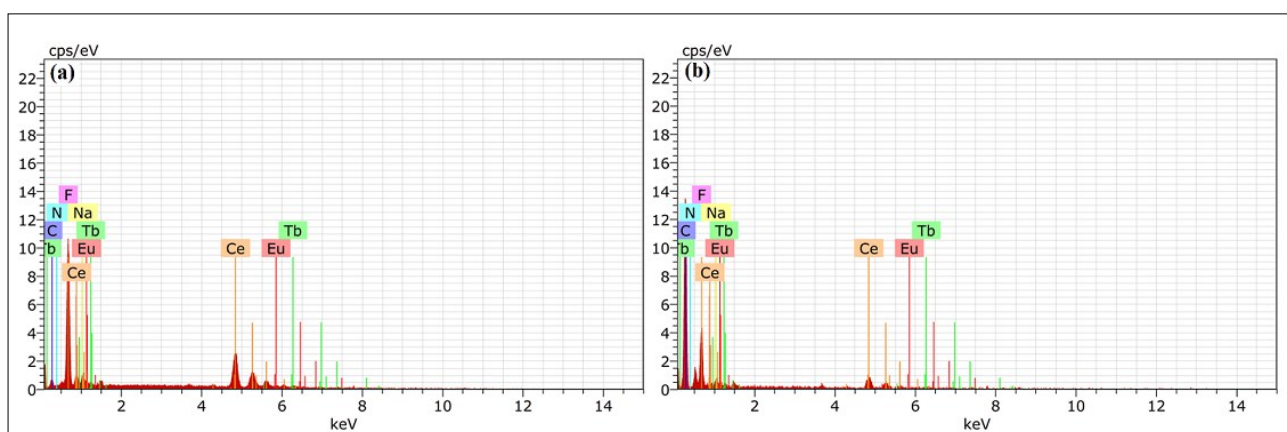

**Fig. S4** EDS spectra of (a) PEI functionalized  $\text{NaCeF}_4:\text{Tb}^{3+}/\text{Eu}^{3+}$  (Eu-7%) nanophosphors (b)  $\text{RGO}@PEI@NaCeF_4:\text{Tb}^{3+}/\text{Eu}^{3+}$  (Eu-7%) nanocomposite

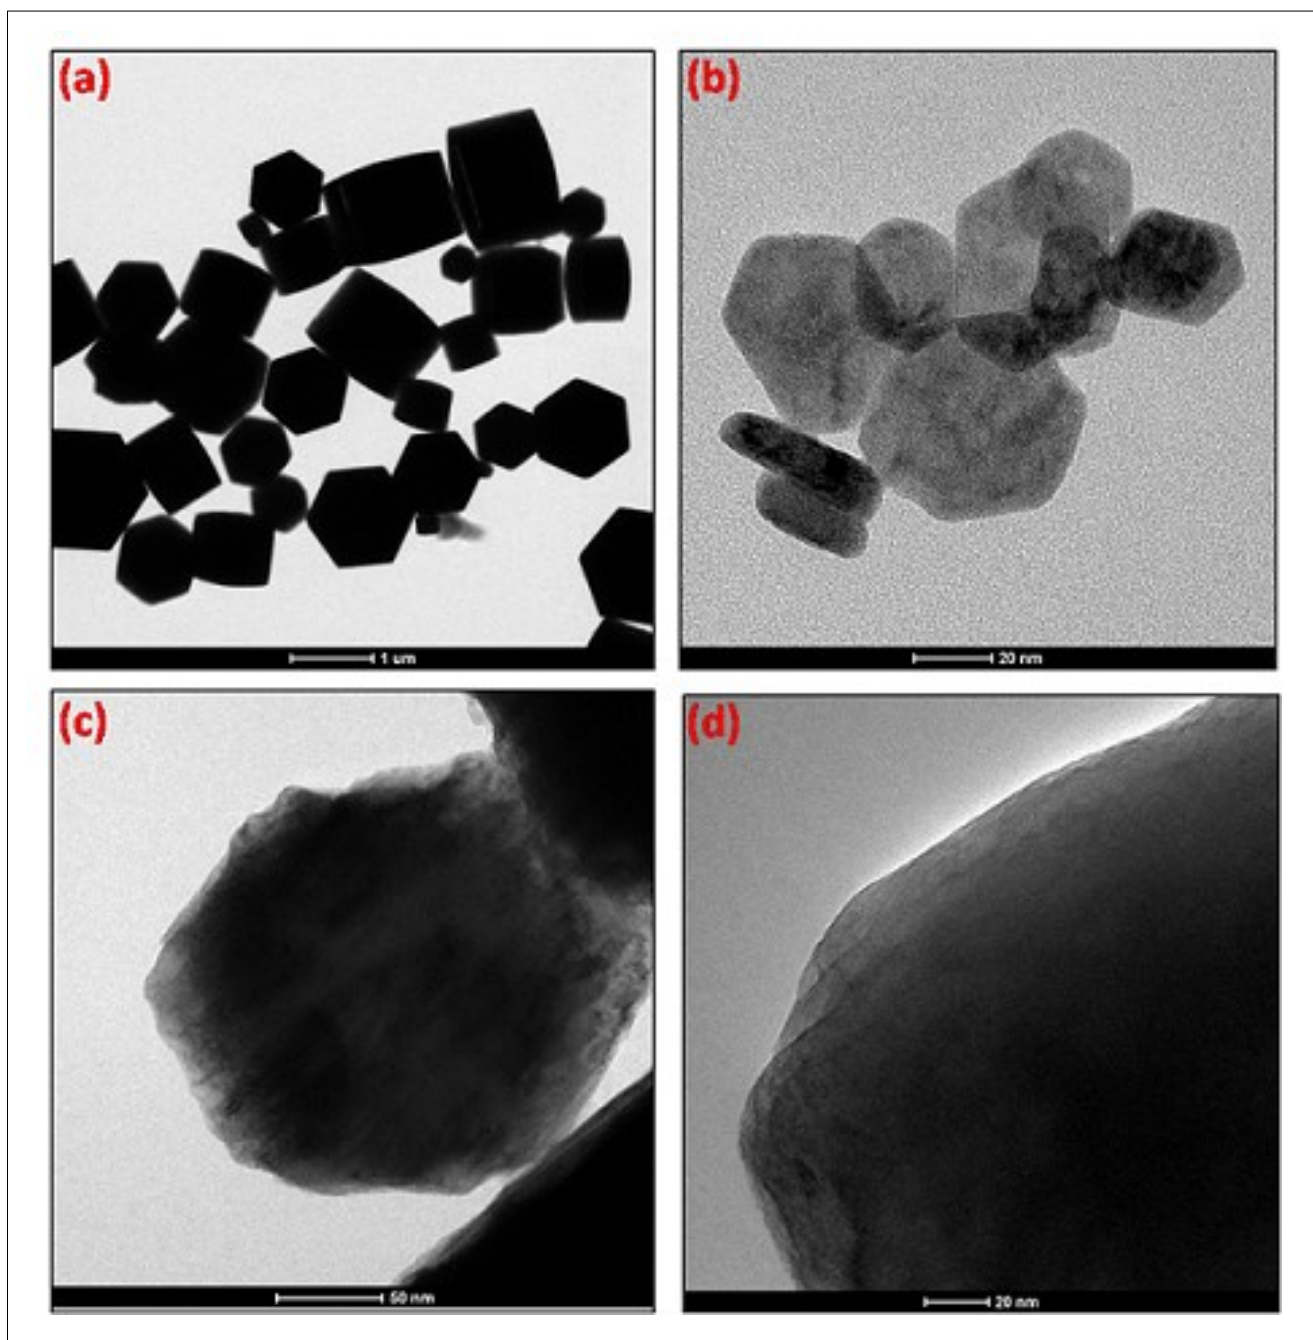

**Fig. S5** TEM micrographs of (a)  $\text{NaCeF}_4:\text{Tb}^{3+}$  nanophosphors (b)  $\text{NaCeF}_4:\text{Tb}^{3+}/\text{Eu}^{3+}$  (Eu-7%) nanophosphors (c)-(d) PEI functionalized  $\text{NaCeF}_4:\text{Tb}^{3+}/\text{Eu}^{3+}$  (Eu-7%) nanostructure

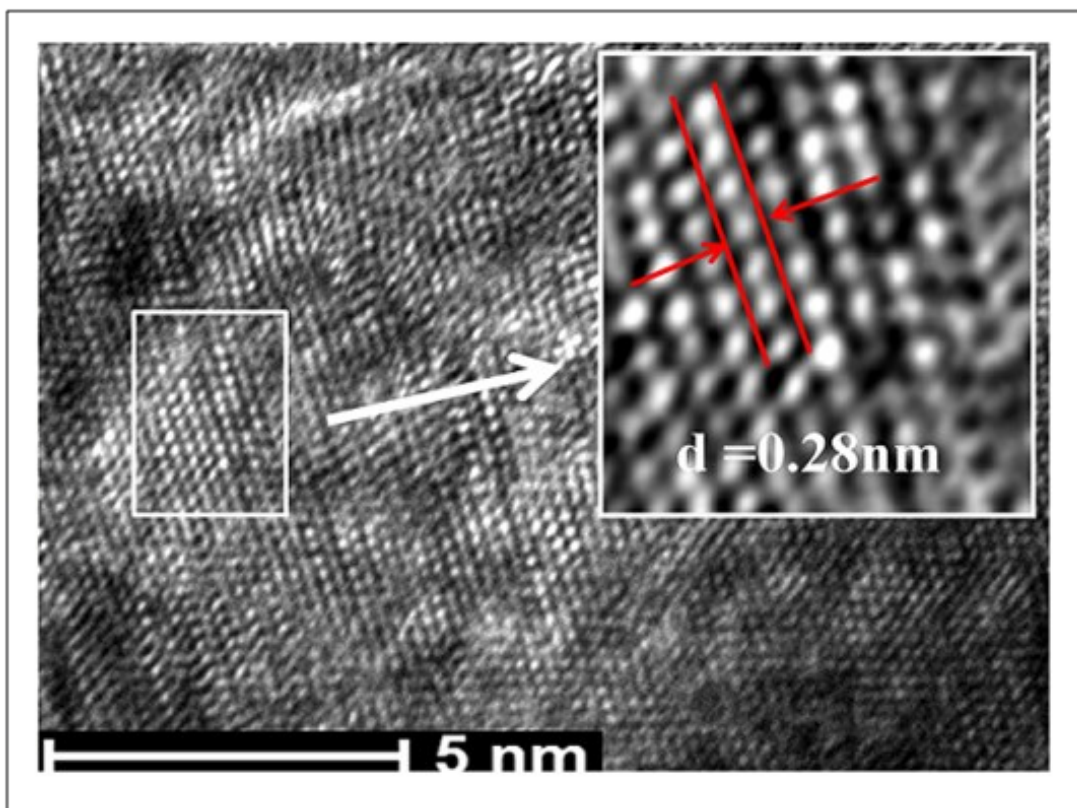

**Fig. S6** HR-TEM images of as-synthesized NaCeF<sub>4</sub>:Tb<sup>3+</sup> nanophosphors

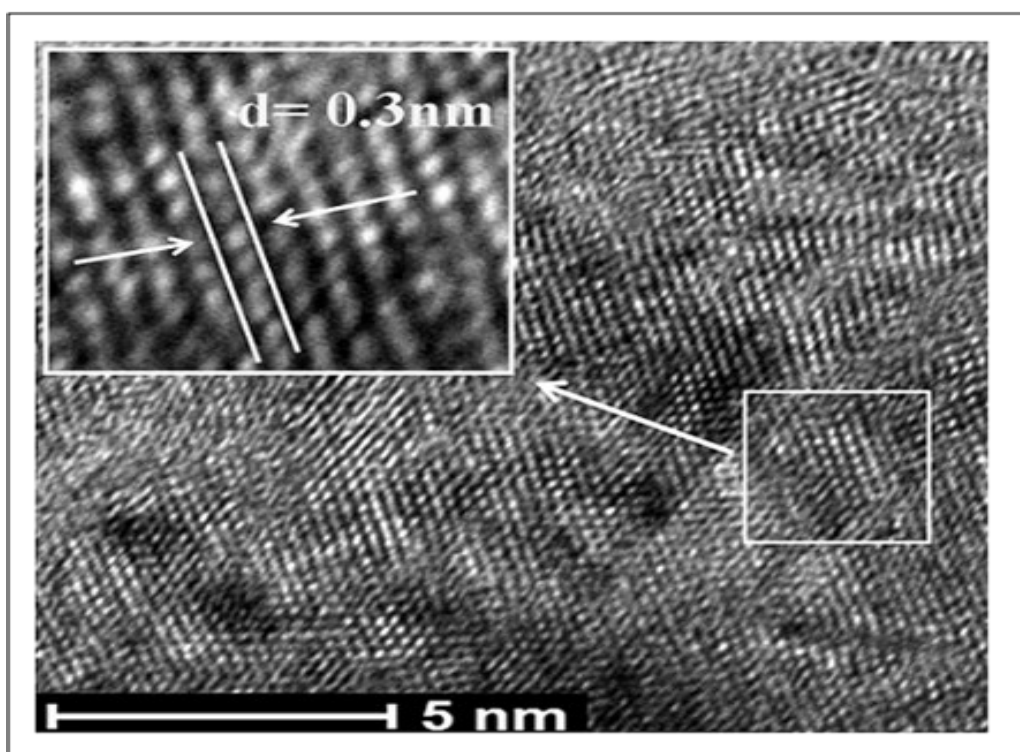

**Fig. S7** HR-TEM images of as-synthesized NaCeF<sub>4</sub>:Tb<sup>3+</sup>/Eu<sup>3+</sup> (Eu-7%) nanostructures showing d-spacing.

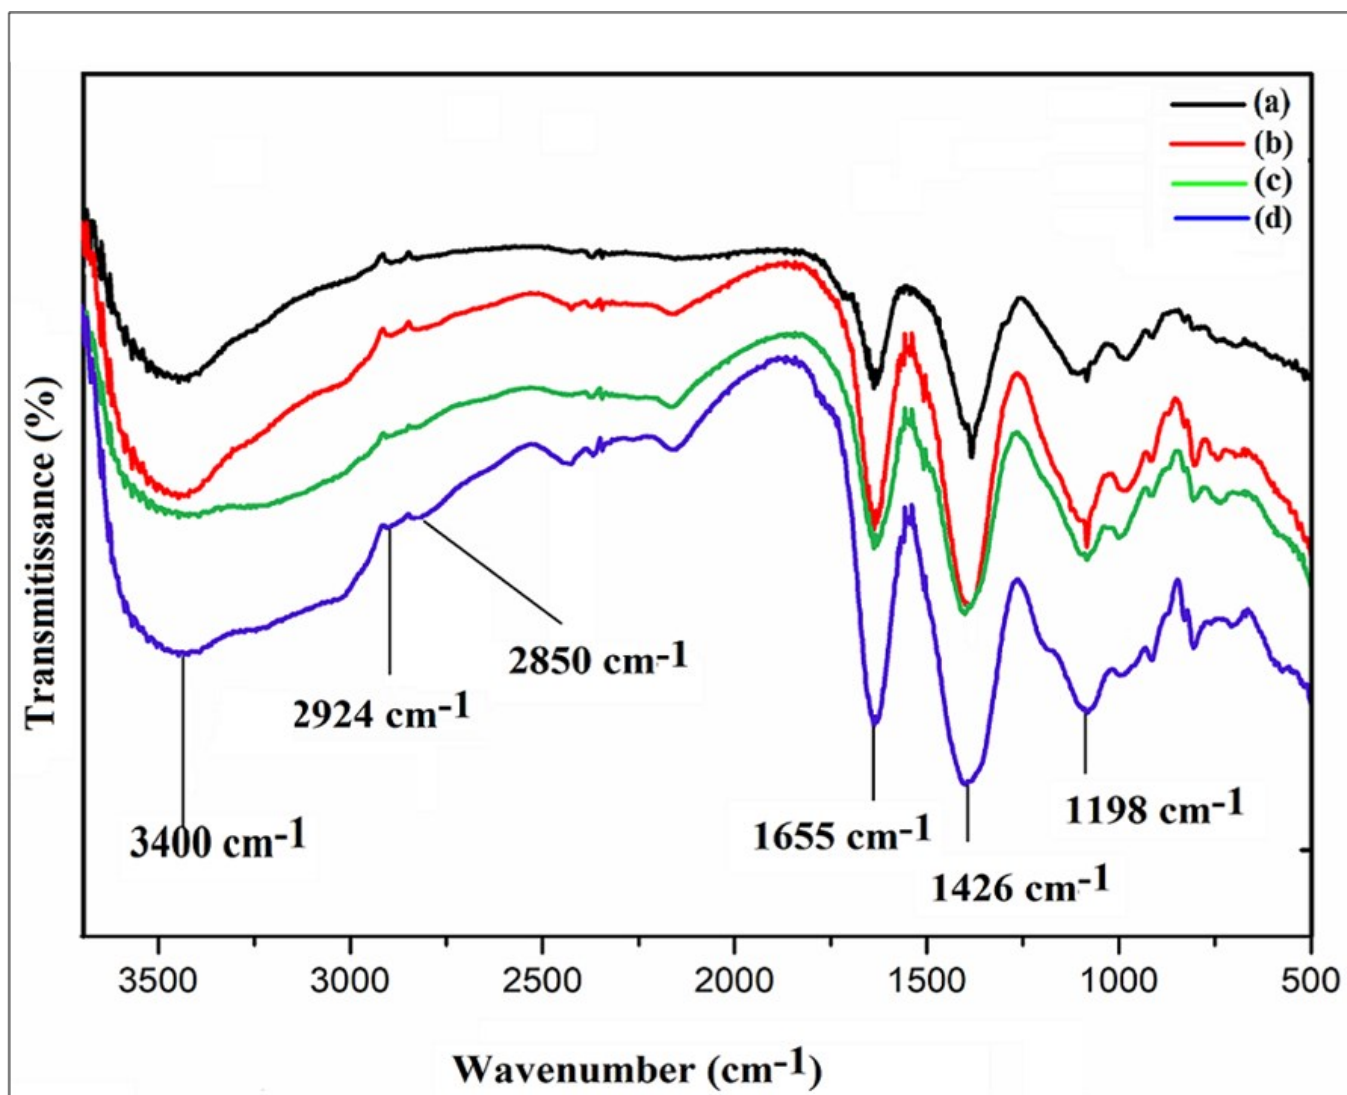

**Fig. S8** FTIR spectra of NaCeF<sub>4</sub>:Tb<sup>3+</sup>/Eu<sup>3+</sup> with varying Eu<sup>3+</sup> contents:(a) 1% (b) 3% (c) 5% (d) 7%

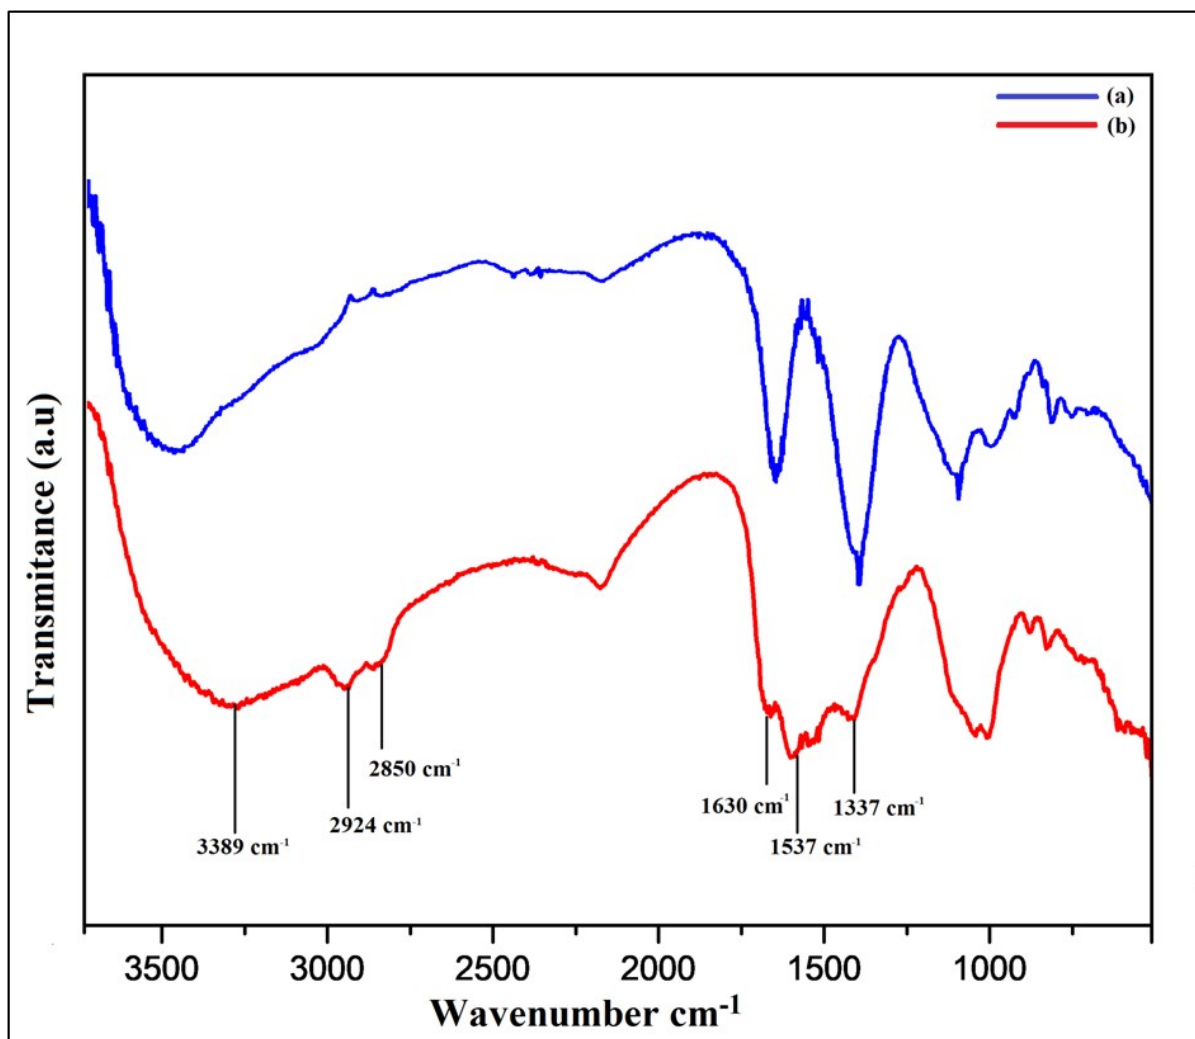

**Fig. S9** FT-IR spectra of fabricated nanomaterials **(a)** NaCeF<sub>4</sub>:Tb<sup>3+</sup>/Eu<sup>3+</sup> (Eu-7%)  
**(b)** PEI functionalized NaCeF<sub>4</sub>:Tb<sup>3+</sup>/Eu<sup>3+</sup> (Eu-7%)



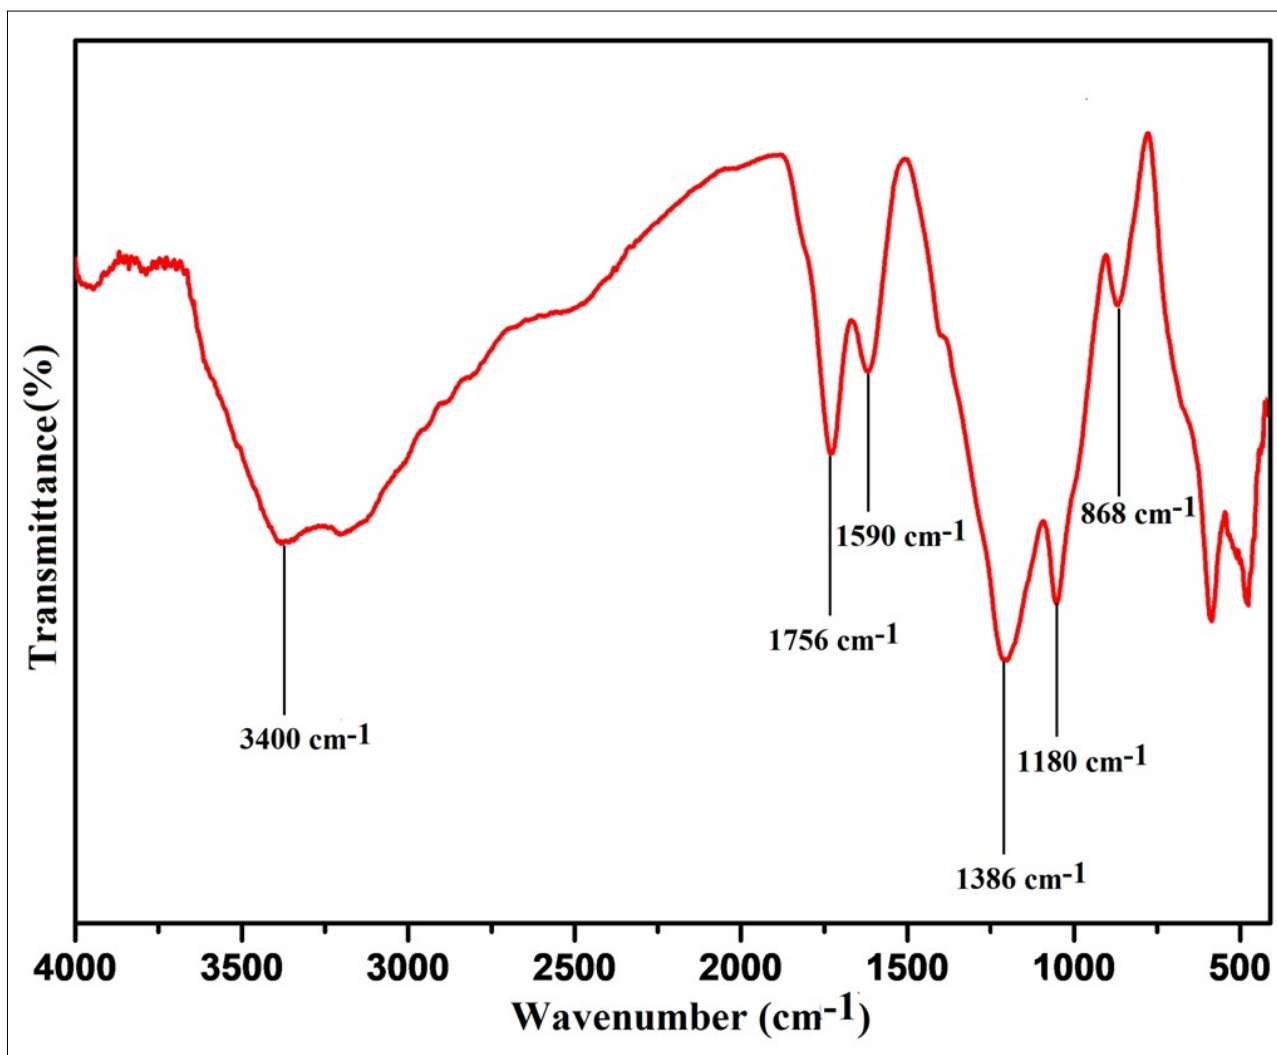

**Fig. S10** FT-IR spectrum of fabricated graphene oxide (GO).

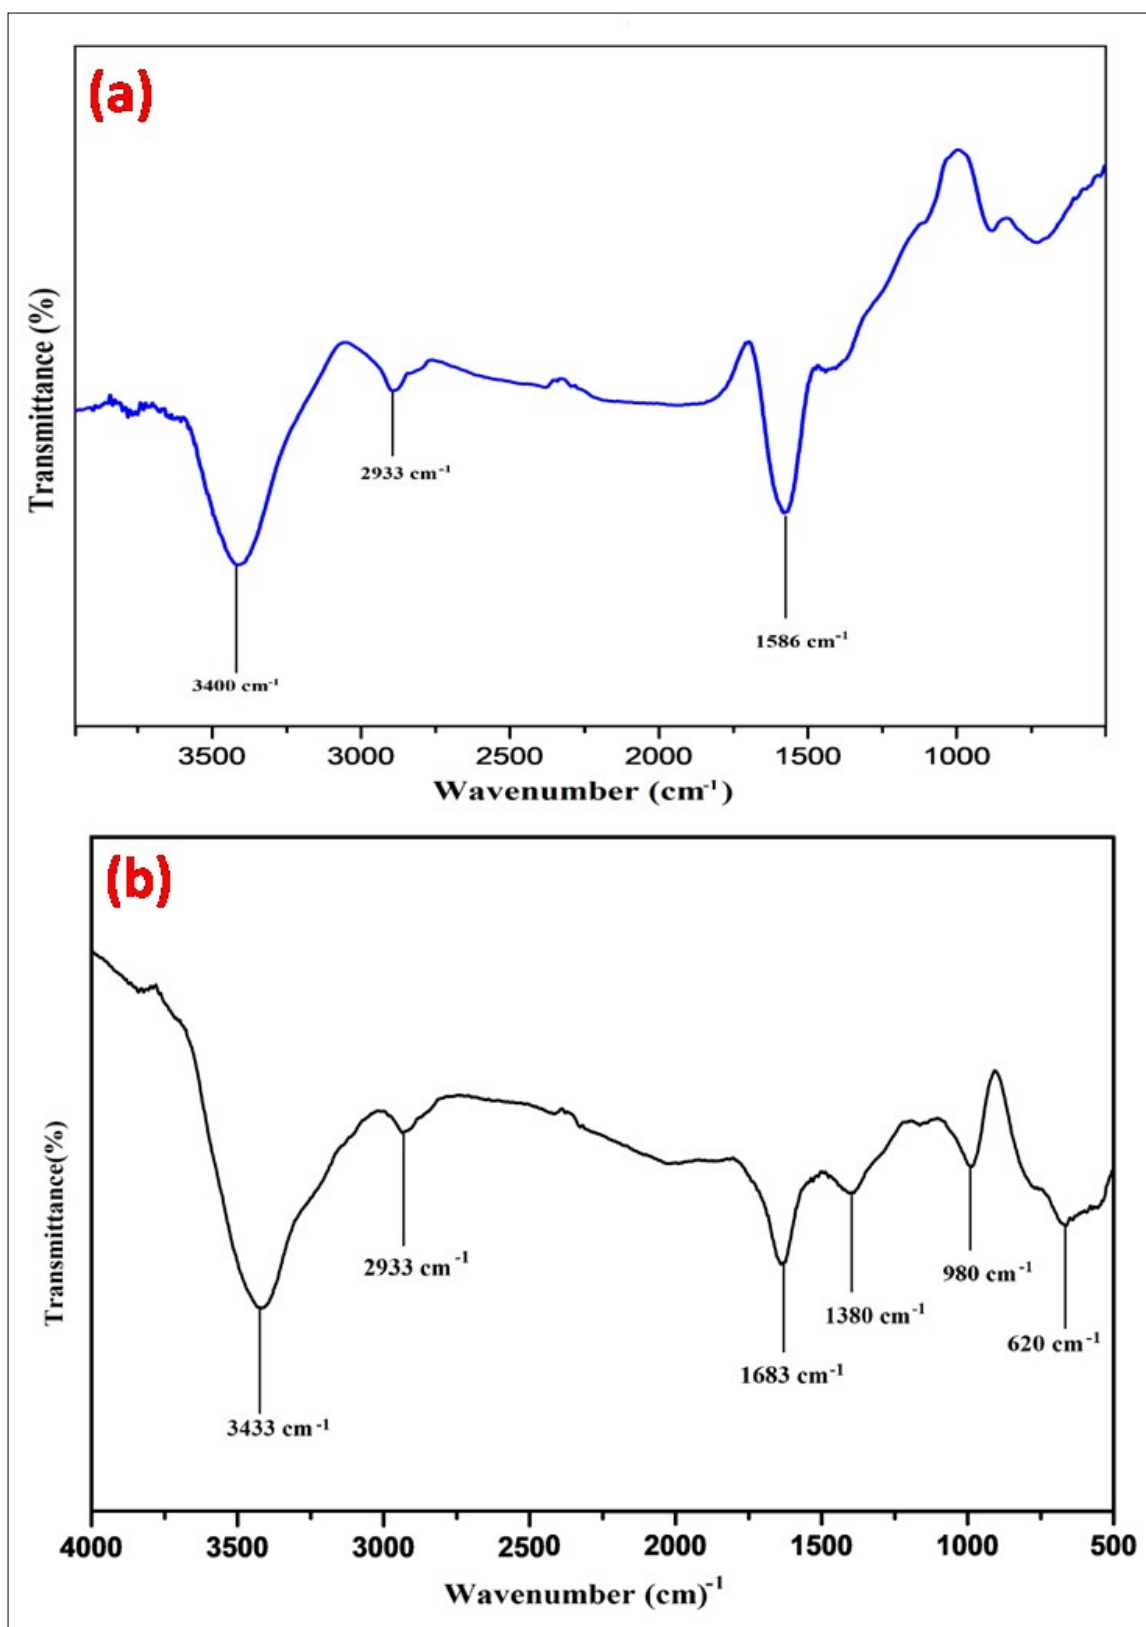

**Fig. S11** FT-IR spectra of fabricated nanomaterials **(a)** Reduced graphene oxide (R-GO)  
**(b)** R-GO@PEI@ NaCeF<sub>4</sub>:Tb<sup>3+</sup>/Eu<sup>3+</sup> (Eu-7%)

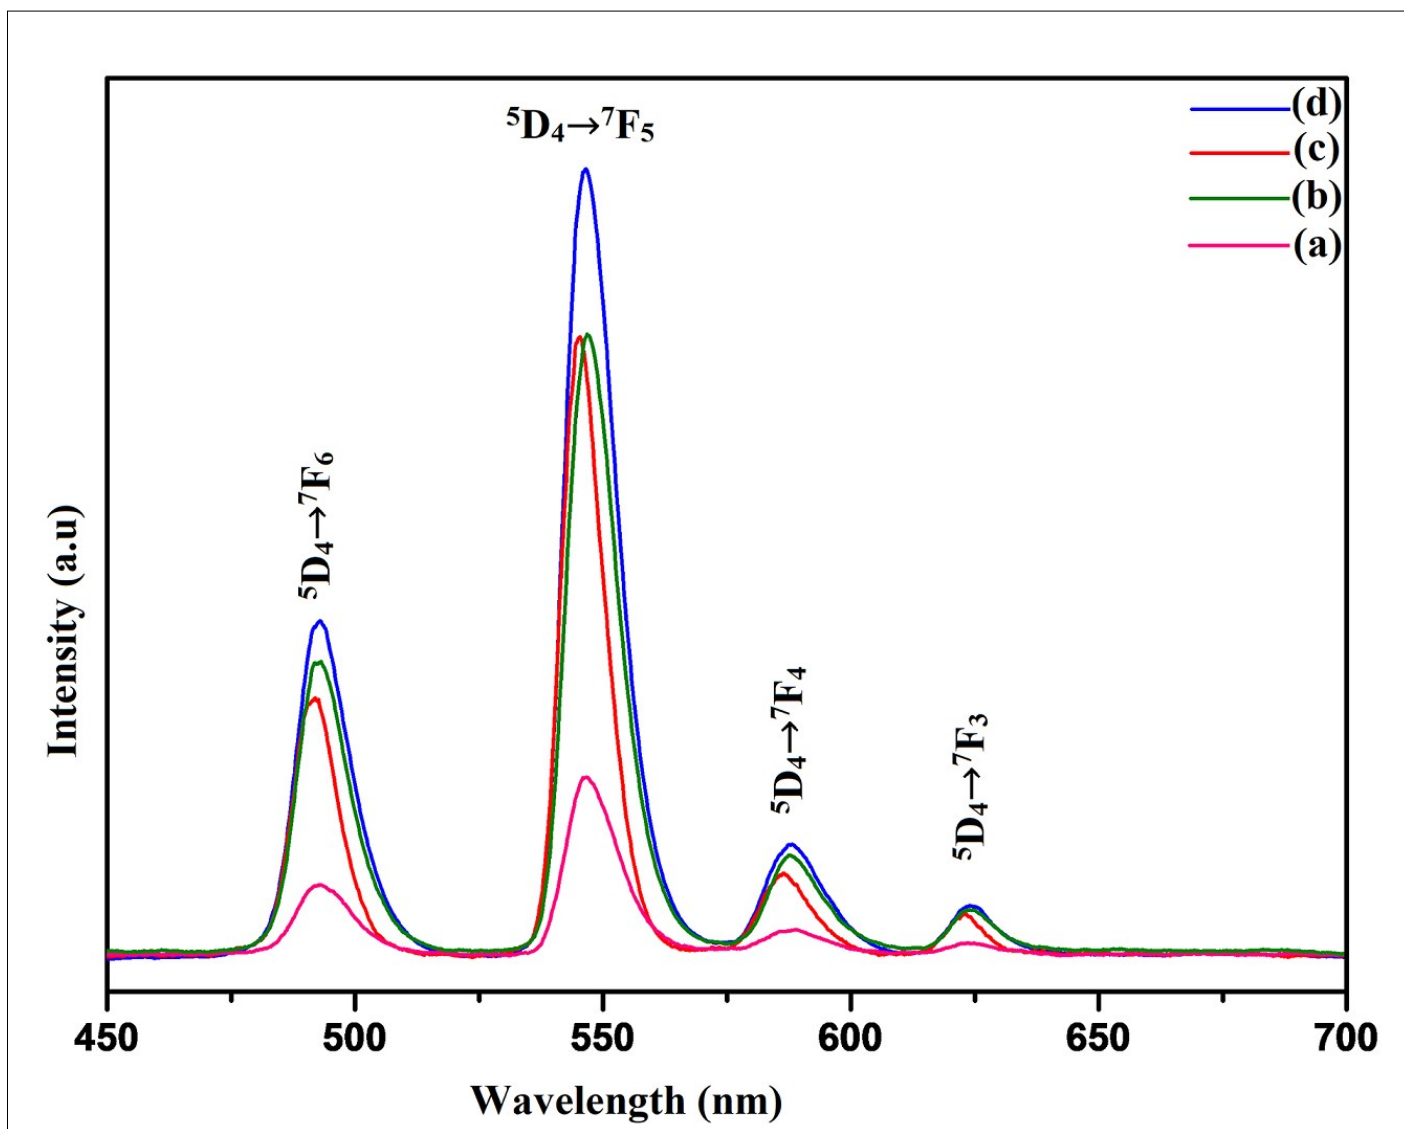

**Fig.S12** Photoluminescence emission spectra of NaCeF<sub>4</sub>:Tb (Tb-5%) nanophosphors at different heating temperatures (a) 120 °C (b) 140 °C (c) 160 °C (d) 180 °C

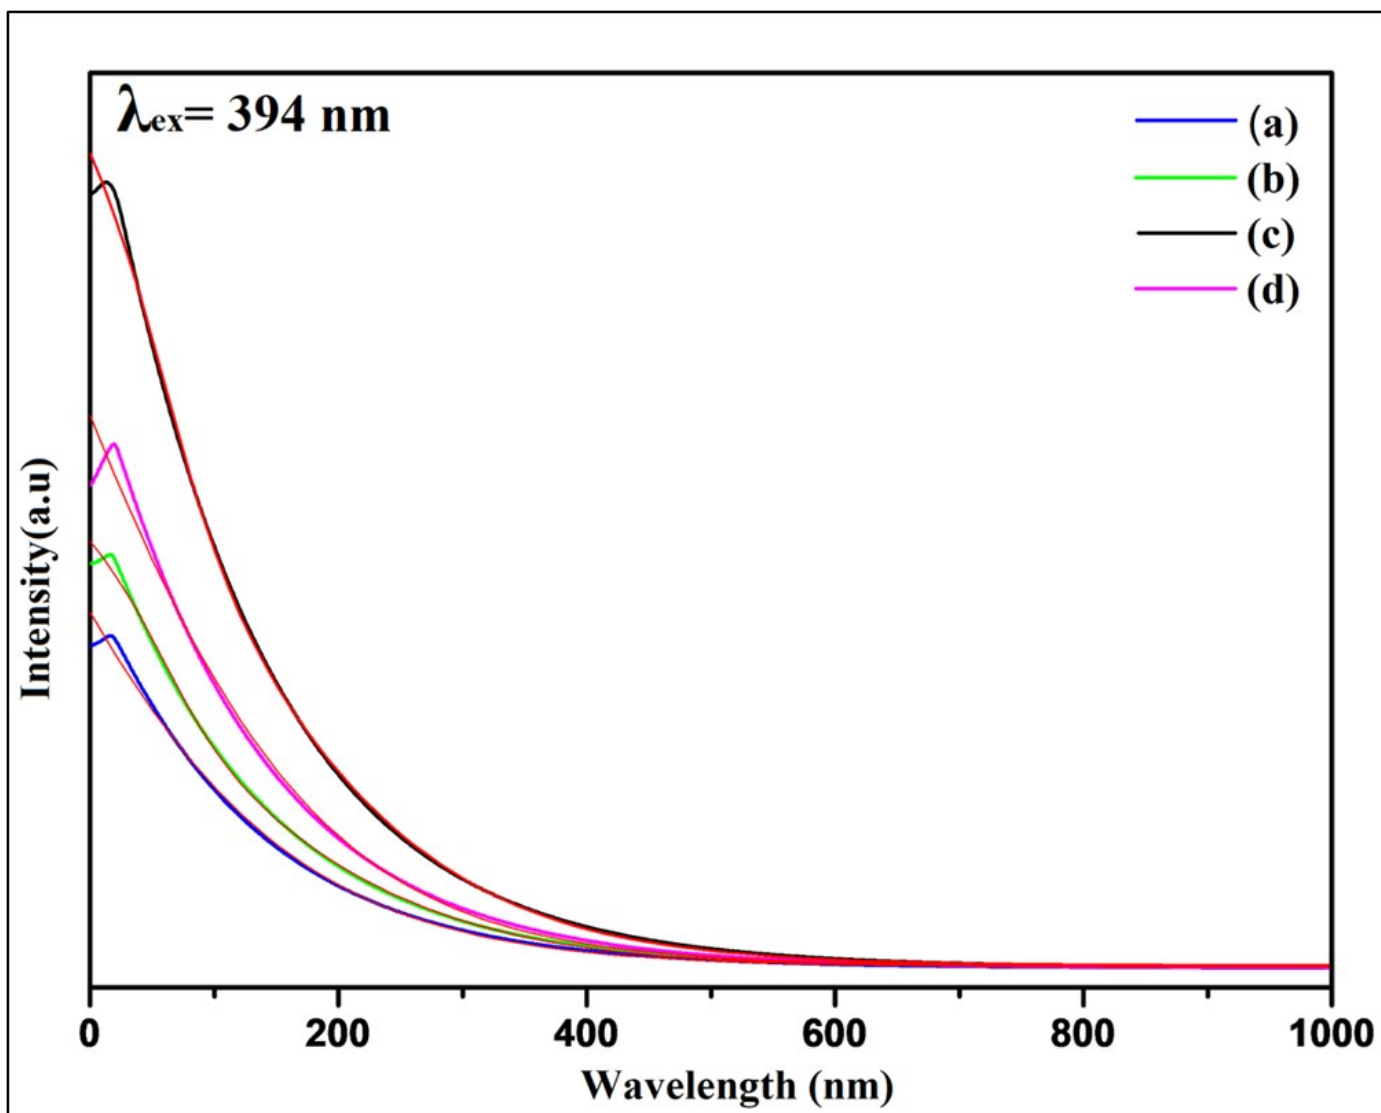

**Fig. S13** Photoluminescence decay curves of NaCeF<sub>4</sub>:Tb<sup>3+</sup> (Tb-5%) with different heating temperature (a) 120 °C (b) 140 °C (c) 160 °C (d) 180 °C

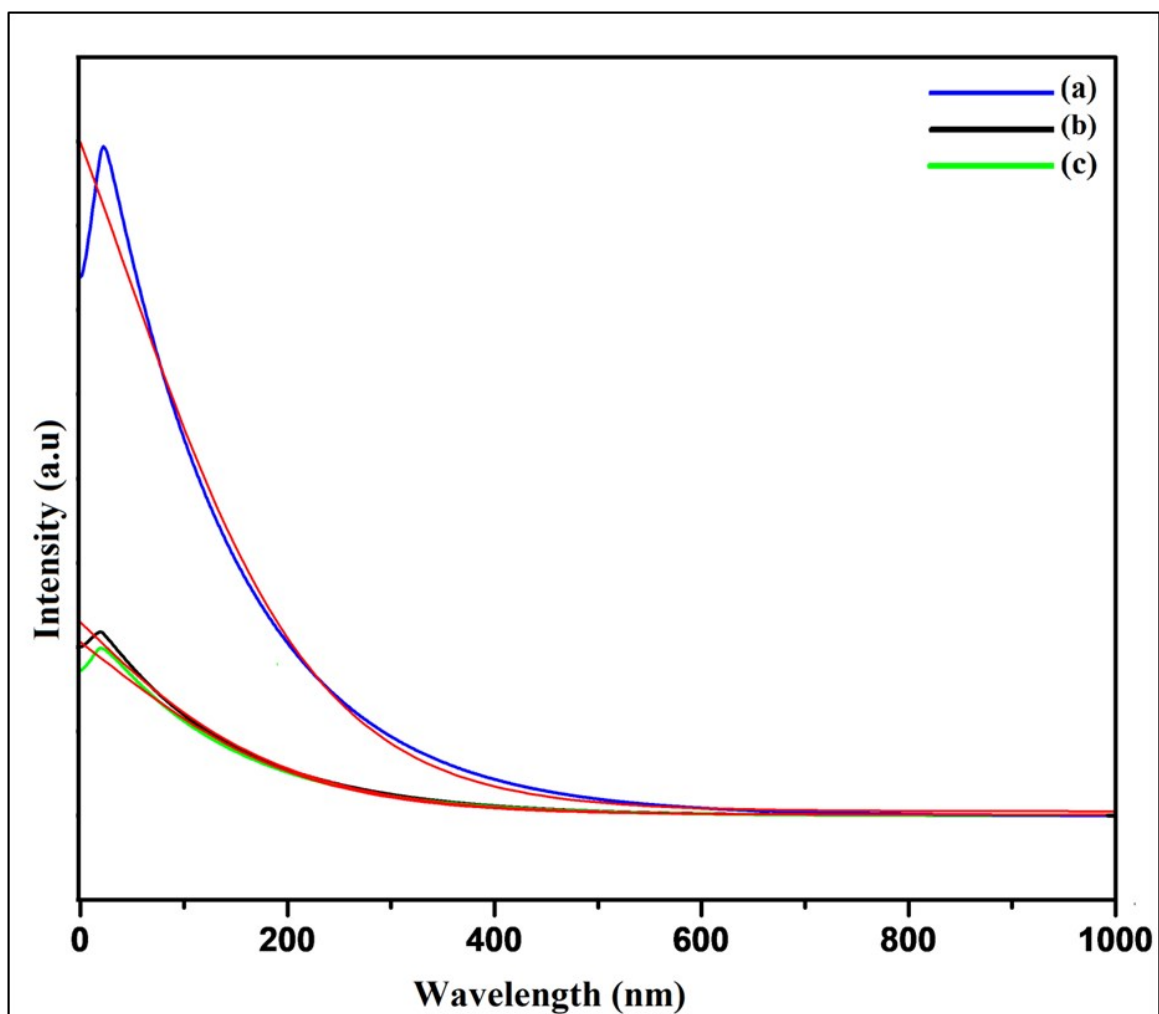

**Fig. S14** Photoluminescence lifetime decay curves of **(a)** PEI-NaCeF<sub>4</sub>:Tb<sup>3+</sup>/Eu<sup>3+</sup> (Eu-7%)  
**(b)** NaCeF<sub>4</sub>:Tb<sup>3+</sup>/Eu<sup>3+</sup> (Eu-7%) **(c)** NaCeF<sub>4</sub>:Tb<sup>3+</sup>/Eu<sup>3+</sup> (Eu-3%)

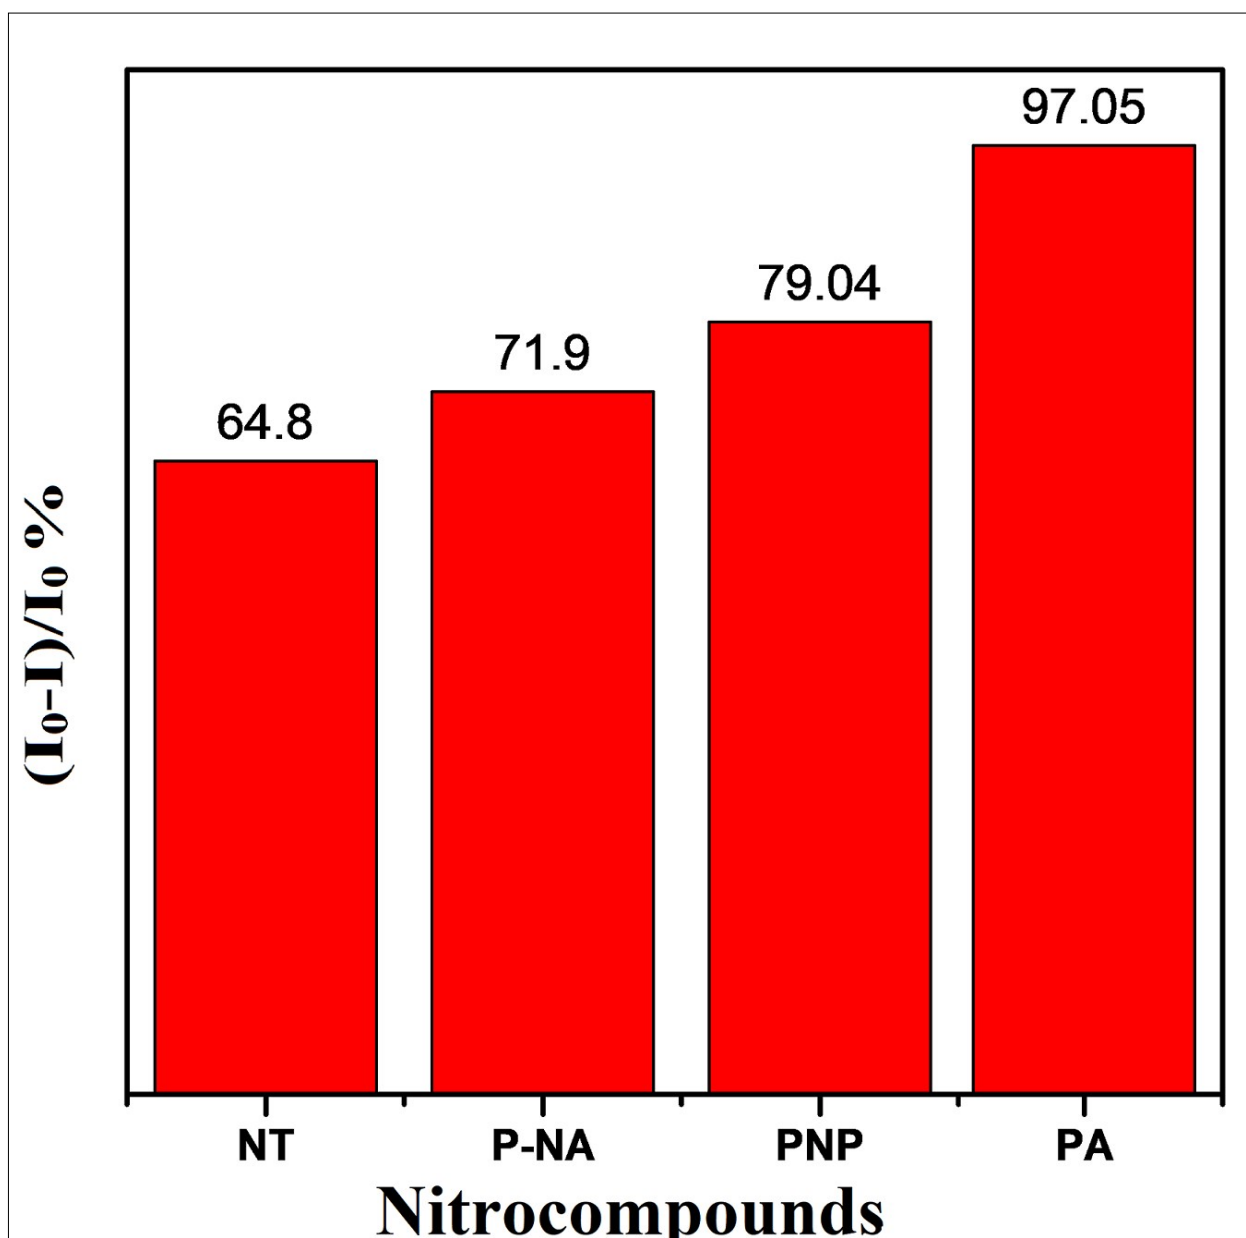

**Fig. S15** Quenching efficiency of the prepared samples containing colloidal solution of PEI-functionalized  $\text{NaCeF}_4:\text{Tb}^{3+}/\text{Eu}^{3+}$  (Eu-7%) with different nitrocompounds (100 ppm) in aqueous medium.

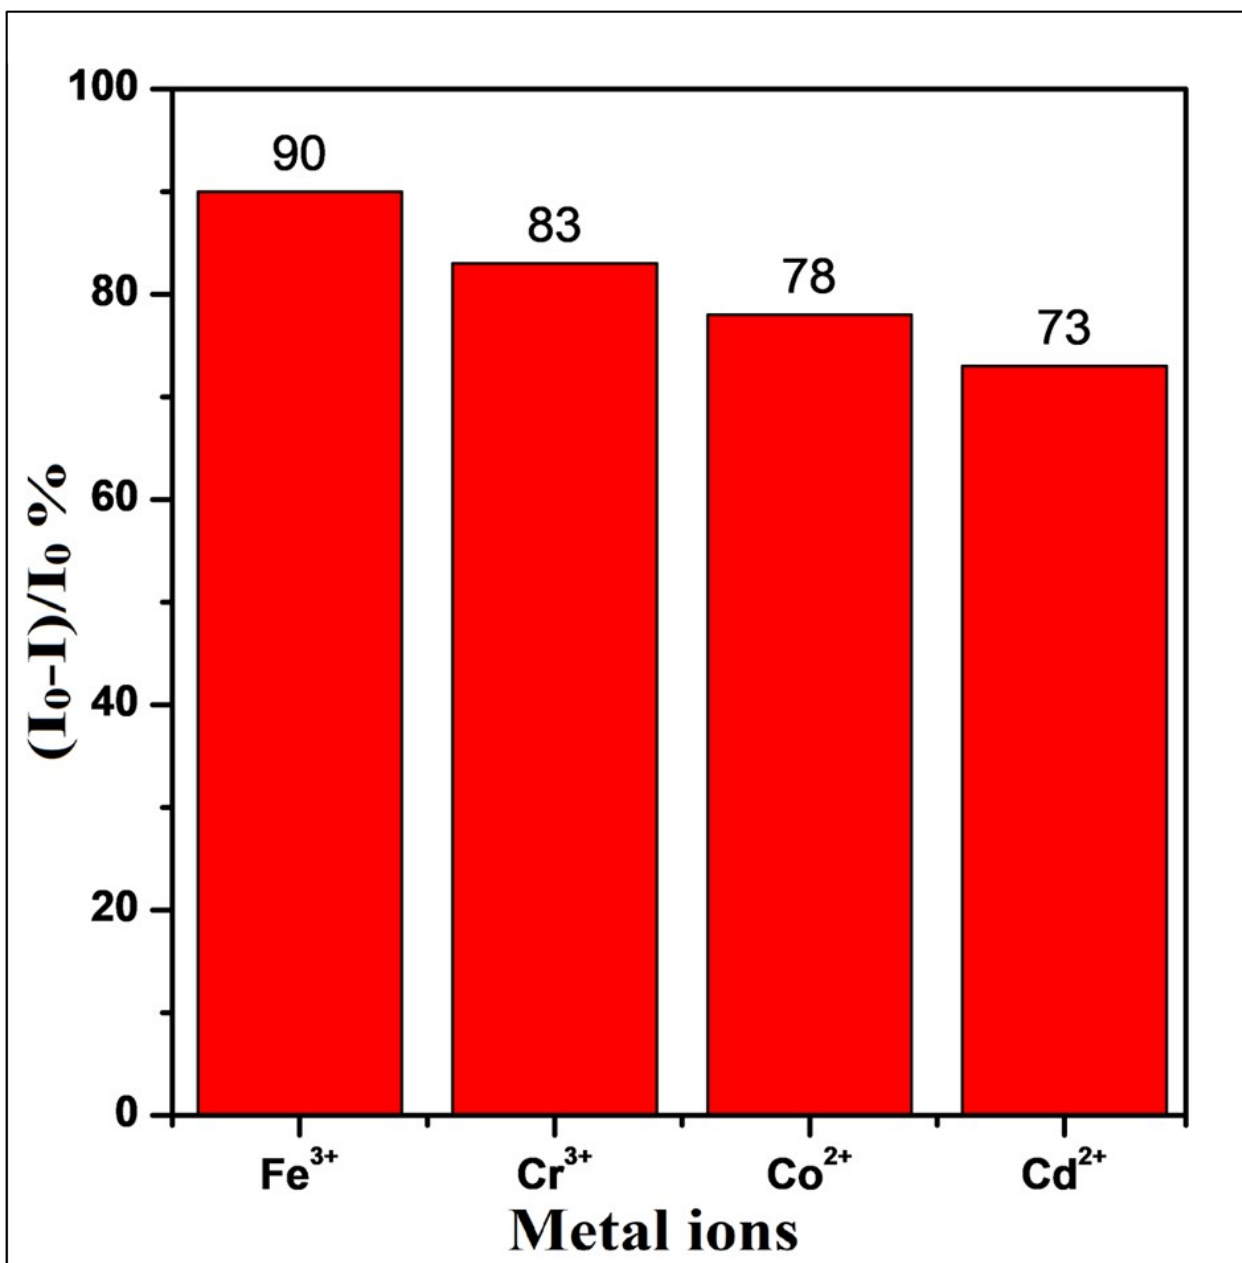

**Fig. S16** Quenching efficiency of the prepared samples containing PEI-functionalized NaCeF<sub>4</sub>:Tb<sup>3+</sup>/Eu<sup>3+</sup> (Eu-7%) nanophosphors and different metal ions analytes (100 ppm) in aqueous medium.

**Table. S1** Atomic and Weight (%) of elements consisting in  $\text{NaCeF}_4:\text{Tb}^{3+}/\text{Eu}^{3+}$  with varying  $\text{Eu}^{3+}$  molar concentrations.

| Elements        | $\text{Eu}^{3+}$ 1 % |       | $\text{Eu}^{3+}$ 3 % |       | $\text{Eu}^{3+}$ 5 % |       | $\text{Eu}^{3+}$ 7 % |       |
|-----------------|----------------------|-------|----------------------|-------|----------------------|-------|----------------------|-------|
|                 | Wt%                  | At%   | Wt%                  | At%   | Wt%                  | At%   | Wt%                  | At%   |
| <b>Cerium</b>   | 66.22                | 43.33 | 78.14                | 43.30 | 70.53                | 29.76 | 64.11                | 24.73 |
| <b>Terbium</b>  | 3.48                 | 0.73  | 4.59                 | 2.34  | 3.99                 | 1.48  | 4.66                 | 1.46  |
| <b>Europium</b> | 0.89                 | 0.19  | 5.29                 | 2.59  | 4.93                 | 1.92  | 5.90                 | 2.10  |
| <b>Sodium</b>   | 3.78                 | 5.46  | 0.42                 | 4.10  | 0.54                 | 1.40  | 1.59                 | 10.14 |
| <b>Fluorine</b> | 17.40                | 30.58 | 10.18                | 42.31 | 18.25                | 56.78 | 20.04                | 57.01 |
| <b>Carbon</b>   | 5.3                  | 16.74 | 1.3                  | 4.92  | 1.73                 | 8.56  | 3.58                 | 4.10  |
| <b>Nitrogen</b> | 2.93                 | 2.97  | 0.08                 | 0.44  | 0.03                 | 0.12  | 0.12                 | 0.46  |



**Table.S2** Atomic and Weight (%) of elements present in PEI-functionalized NaCeF<sub>4</sub>:Tb<sup>3+</sup>/Eu<sup>3+</sup> (Eu-7%) nanostructure and RGO doped PEI-NaCeF<sub>4</sub>:Tb<sup>3+</sup>/Eu<sup>3+</sup> (Eu-7%) nanocomposite.

| Elements        | PEI- functionalized NaCeF <sub>4</sub> :Tb <sup>3+</sup> /Eu <sup>3+</sup> |       | RGO-PEI- NaCeF <sub>4</sub> :Tb <sup>3+</sup> /Eu <sup>3+</sup> Nanocomposite |       |
|-----------------|----------------------------------------------------------------------------|-------|-------------------------------------------------------------------------------|-------|
|                 | Wt%                                                                        | At%   | Wt%                                                                           | At%   |
| <b>Cerium</b>   | 58.25                                                                      | 18.30 | 20.08                                                                         | 2.41  |
| <b>Terbium</b>  | 3.81                                                                       | 1.06  | 2.44                                                                          | 0.26  |
| <b>Europium</b> | 5.29                                                                       | 1.53  | 1.13                                                                          | 0.13  |
| <b>Sodium</b>   | 3.83                                                                       | 7.34  | 1.87                                                                          | 1.37  |
| <b>Fluorine</b> | 24.73                                                                      | 57.34 | 15.30                                                                         | 13.56 |
| <b>Carbon</b>   | 2.94                                                                       | 7.80  | 55.53                                                                         | 77.87 |
| <b>Nitrogen</b> | 1.15                                                                       | 6.63  | 3.65                                                                          | 4.40  |
|                 |                                                                            |       |                                                                               |       |
